# Supplementary material
Source: PubMed Central journal article supplement (PMC3443257)
Supplement: NIHMS376978-supplement-1_si_001.pdf [file NIHMS376978-supplement-1_si_001.pdf]

# Two-strain, cell-selective protein labeling in mixed bacterial cultures

Frank Truong<sup>1</sup>, Tae Hyeon Yoo<sup>2</sup>, Thomas J. Lampo<sup>†</sup>, and David A. Tirrell<sup>1,\*</sup>

<sup>1</sup>Division of Chemistry and Chemical Engineering, California Institute of Technology, Pasadena, CA 91125,

<sup>2</sup>Department of Molecular Science and Technology, Division of Applied Chemistry and Biological Engineering, Ajou University, Suwon, South Korea. \*Corresponding author: tirrell@caltech.edu

## Supporting Information

|                             | Connolly Solvent<br>Excluded Volume ( $\text{\AA}^3$ ) | Connolly Molecular<br>Area ( $\text{\AA}^2$ ) |
|-----------------------------|--------------------------------------------------------|-----------------------------------------------|
| Methionine                  | 126.964                                                | 154.321                                       |
| Methionine Side Chain       | 94.736                                                 | 124.784                                       |
| Propargylglycine            | 93.655                                                 | 120.317                                       |
| Propargylglycine Side Chain | 58.185                                                 | 87.38                                         |

**Table SI 1:** Dimensions of methionine and propargylglycine. Values were calculated in ChemBio3D Ultra.

|           | Mutations                           | Normalized Fluorescence with Pra |
|-----------|-------------------------------------|----------------------------------|
| MO2b_13-2 | L13P, A256G, P257T, Y260Q,<br>H301F | 100%                             |
| Clone 1   | <b>V328M</b> , V389L                | 143%                             |
| Clone 5   | S207N, Q379H, Δ548W                 | 151%                             |
| Clone 12  | <b>V328L</b>                        | 131%                             |
| Clone 15  | <b>T339S</b> , I515S                | 136%                             |
| Clone 16  | <b>A331V</b>                        | 163%                             |

**Table SI 2:** Selection of the best performing mutants from MO9c\_4 screened population compared to MO2b\_13-2. KMSKS motif is located at amino acids 332-336 in *E. coli* methionyl-tRNA synthetase. Mutations in bold are located in the flexible regions adjacent to the KMSKS sequence.

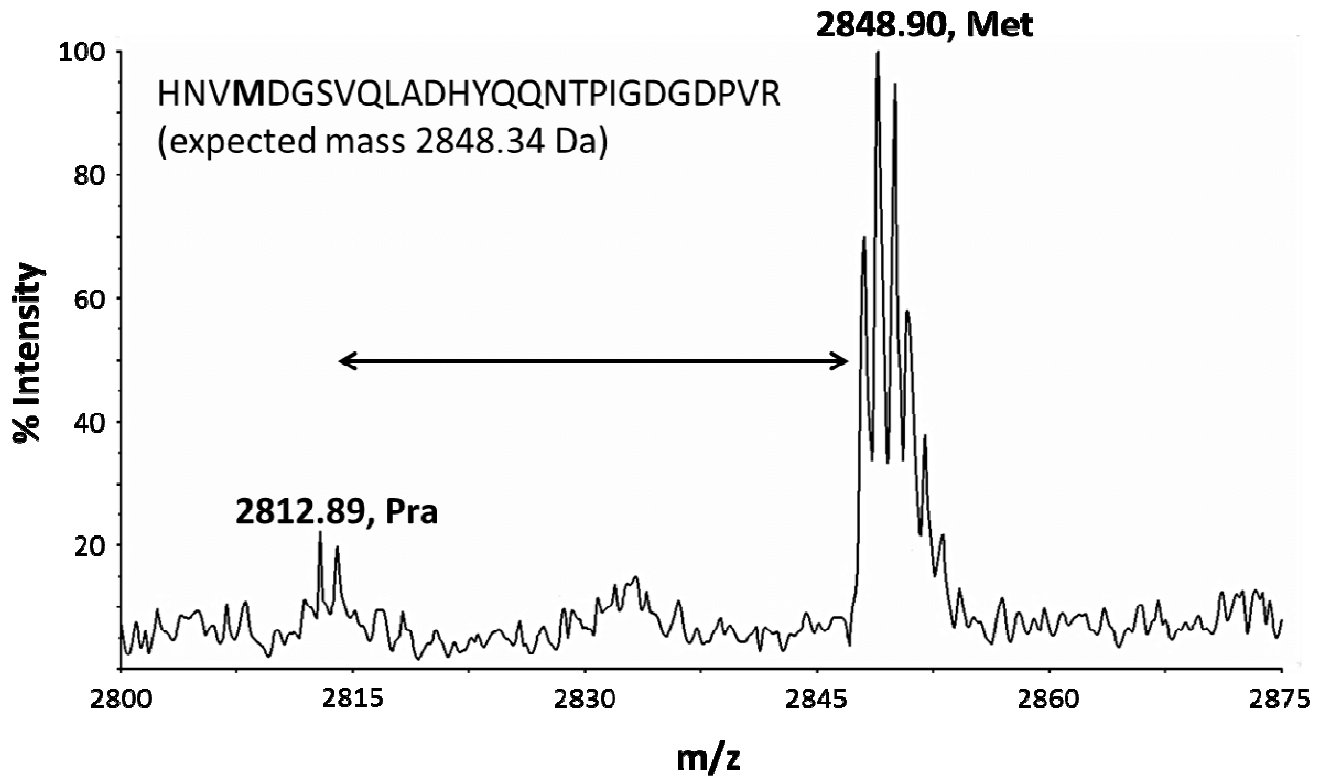

**Figure SI 1:** MALDI-TOF spectrum of tryptic digest of purified GFP<sub>Prm</sub>\_AM. His-tagged protein was expressed in a Met-auxotrophic strain of *E. coli* harboring PraRS in medium supplemented with 20 amino acids (269  $\mu$ M Met) plus 4 mM Pra. Replacement of Met by Pra in the peptide HNVMDGSVQLADHYQQNTPIGDGDPVR results in a decrease in mass of 36 Da.
